# Supplementary material for: Mechanically rigid supramolecular assemblies formed from an Fmoc-guanine conjugated peptide nucleic acid
Source: PubMed Central journal article supplement (PMC6868146; doi:10.1038/s41467-019-13250-x), 2019-11-20
Supplement: 41467_2019_13250_MOESM1_ESM.pdf [file 41467_2019_13250_MOESM1_ESM.pdf]

1 SUPPLEMENTARY INFORMATION

2  
3 **Mechanically Rigid Supramolecular Assemblies Formed from an Fmoc-Guanine**  
4 **Conjugated Peptide Nucleic Acid**

5  
6 *Vasantha Basavalingappa<sup>1</sup>, Santu Bera<sup>1</sup>, Bin Xue<sup>2</sup>, Ido Azuri<sup>3</sup>, Yiming Tang<sup>4</sup>, Kai Tao<sup>1</sup>, Linda*  
7 *J. W. Shimo<sup>5</sup>, Michael R. Sawaya<sup>6</sup>, Sofiya Kolusheva<sup>7</sup>, David S. Eisenberg<sup>6</sup>, Leeor Kronik<sup>3</sup>, Yi*  
8 *Cao<sup>2</sup>, Guanghong Wei<sup>4</sup>, Ehud Gazit\*<sup>1</sup>*

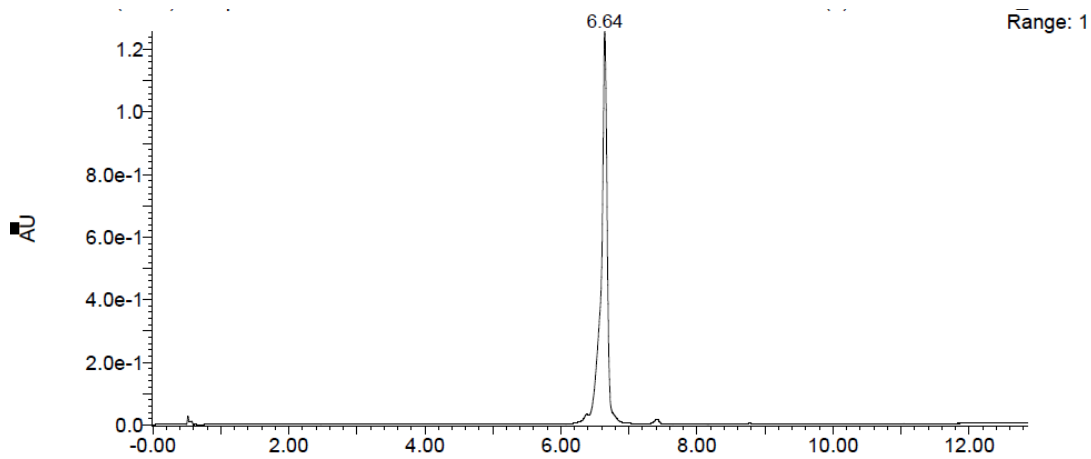

Supplementary Figure 1. LC profile of the pure adenine PNA-derivative.

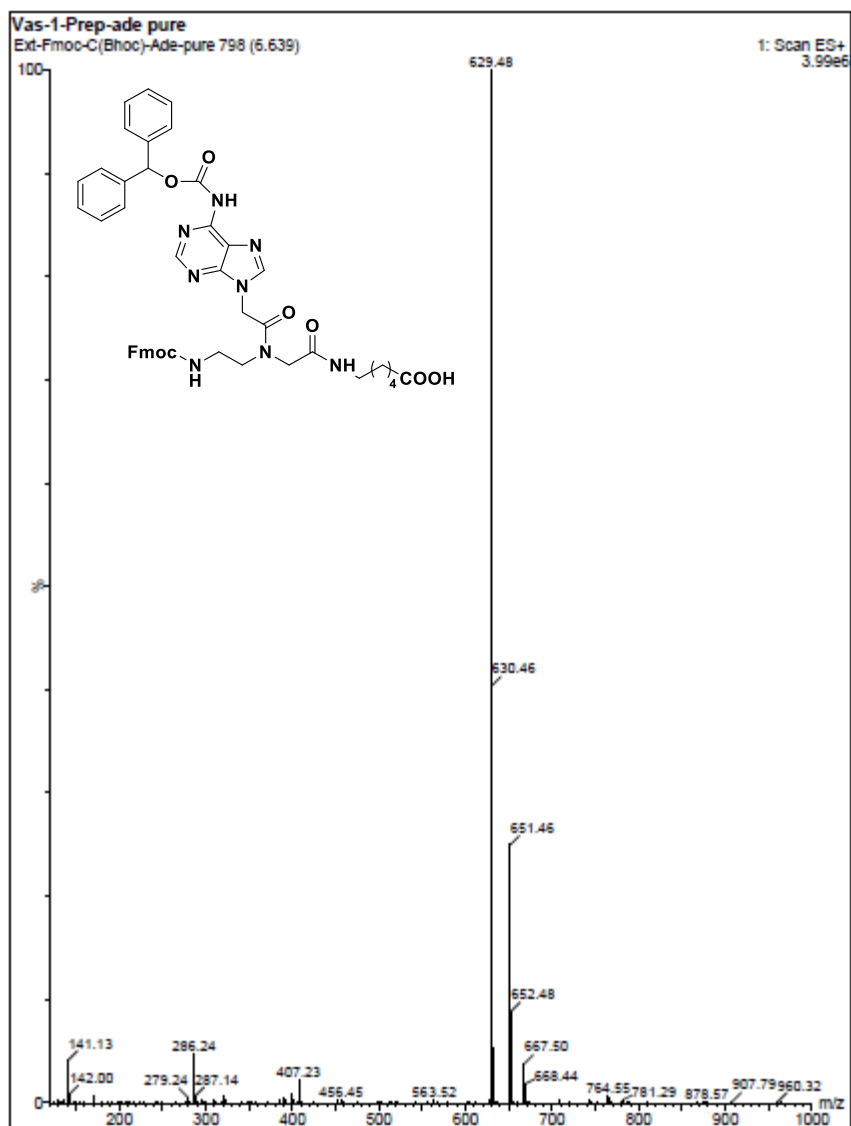

Supplementary Figure 2. Mass spectrum of the pure adenine PNA-derivative.

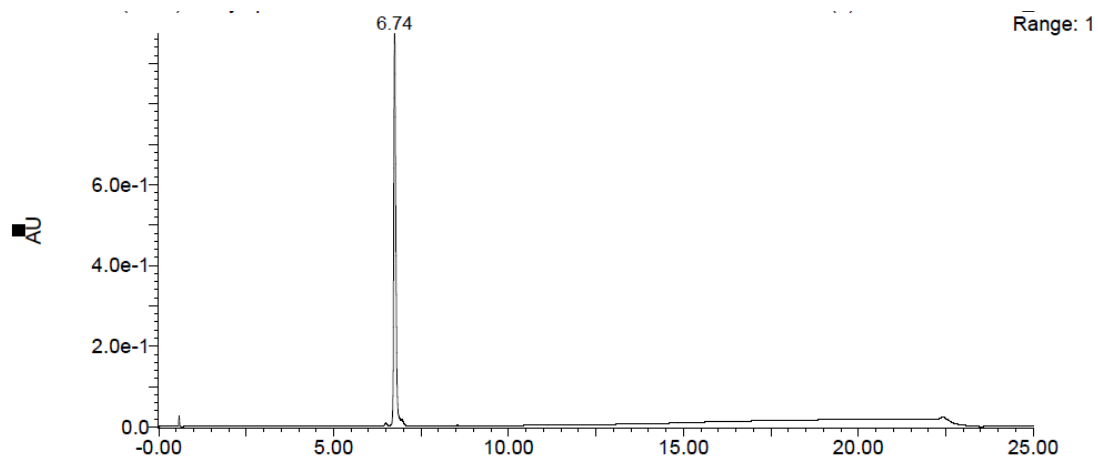

3 **Supplementary Figure 3.** LC profile of the pure cytosine PNA-derivative.

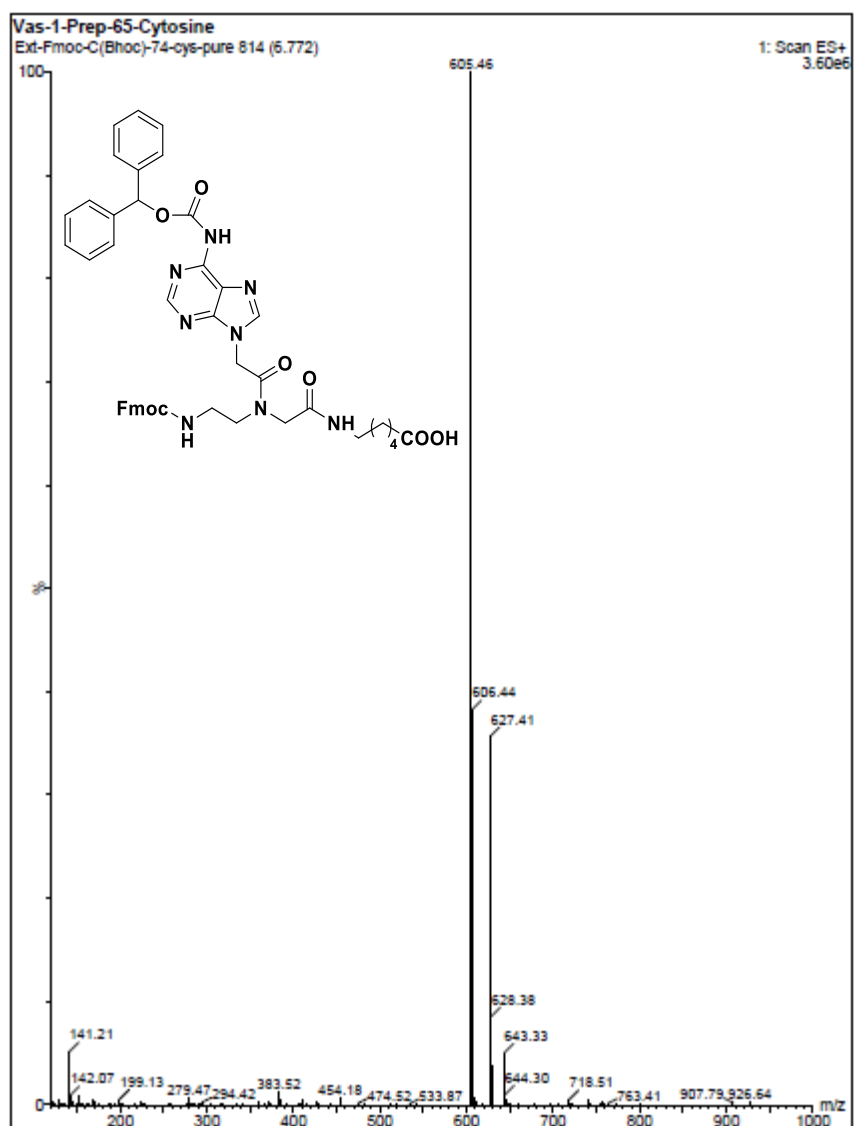

23 **Supplementary Figure 4.** Mass spectrum of the pure cytosine PNA-derivative.

24

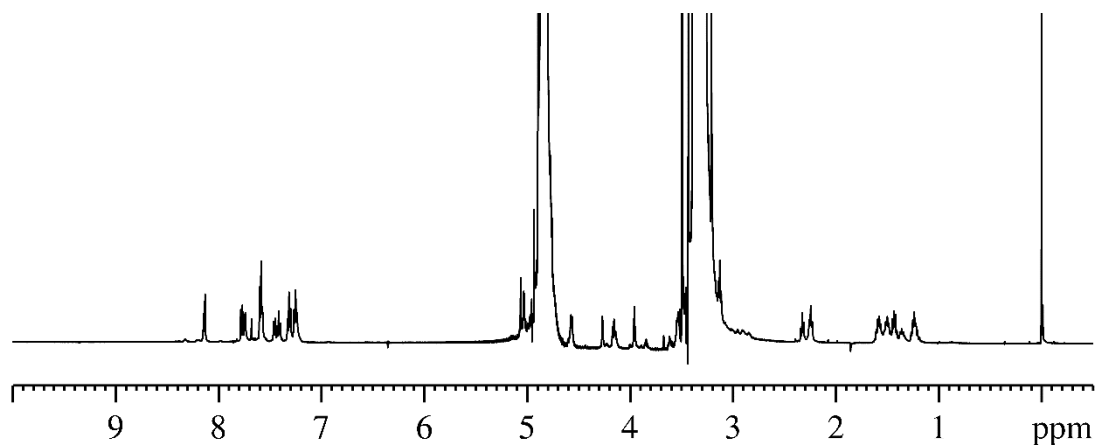

1

2 **Supplementary Figure 5.** A 500 MHz  $^1\text{H}$  NMR spectrum of the adenine PNA-derivative in  
3 DMSO- $\text{d}_6$  and MeOH.

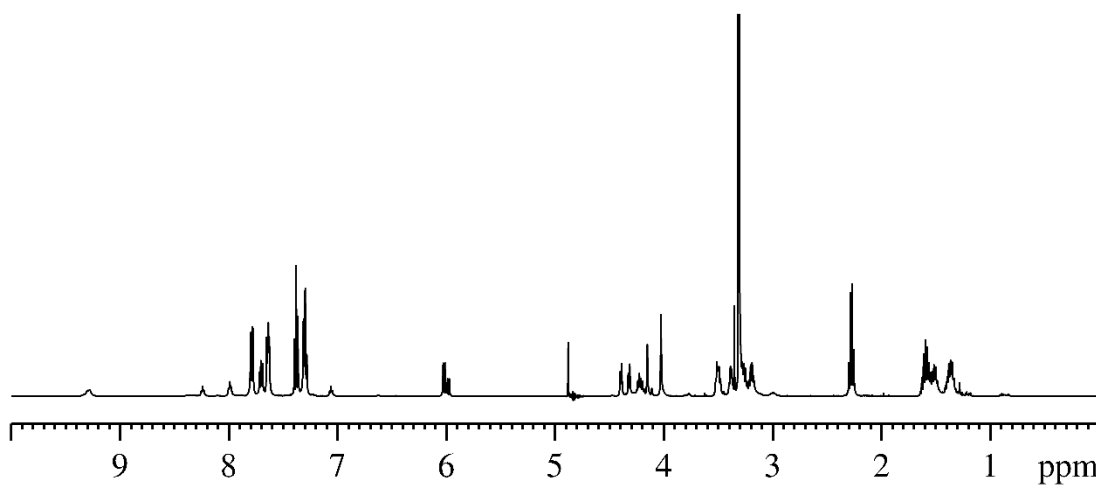

4

5 **Supplementary Figure 6.** A 500 MHz  $^1\text{H}$  NMR spectrum of the cytosine PNA-derivative in  
6 MeOH- $\text{d}_3$ .

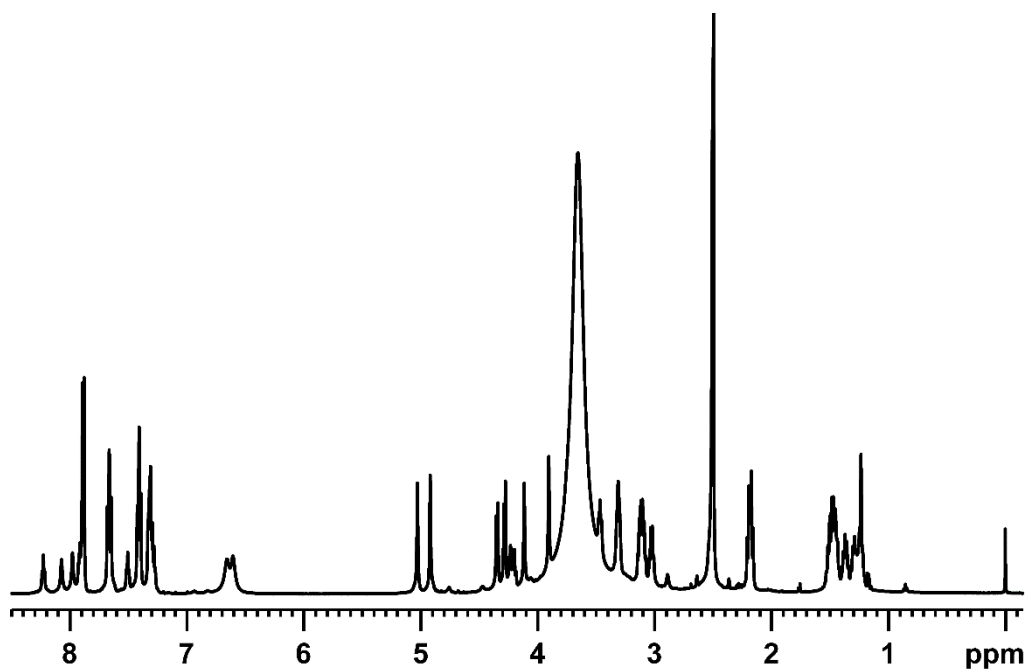

1

2 **Supplementary Figure 7.** A 500 MHz  $^1\text{H}$  NMR spectrum of the PNA-quadruplex in  
3 DMSO- $\text{d}_6$ .

4

a)

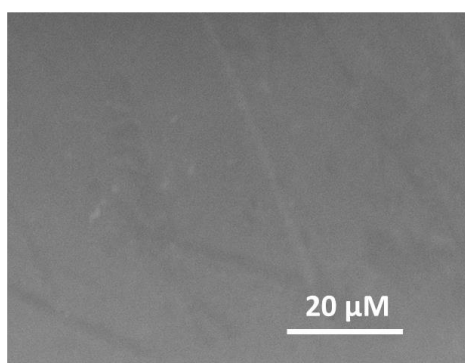

b)

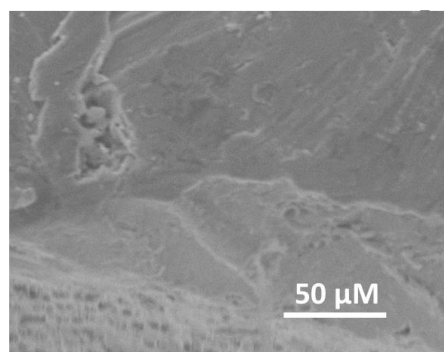

c)

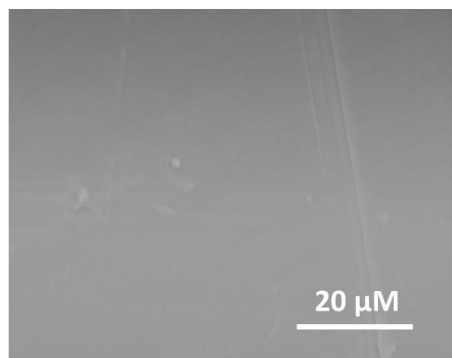

d)

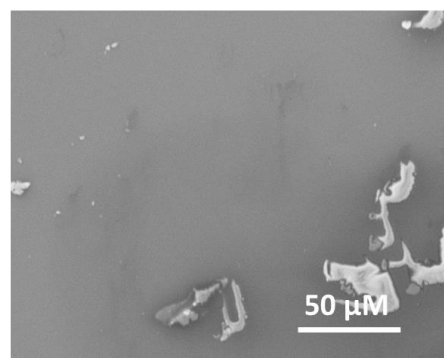

10

1 **Supplementary Figure 8.** Morphological characterization of adenine and cytosine PNA-  
2 derivatives. **(a, b)** SEM images of the adenine PNA-derivative at **(a)** 0.1 and **(b)** 0.5 mg/mL.  
3 **(c, d)** SEM images of the cytosine PNA-derivative at **(c)** 0.1 and **(d)** 0.5 mg/mL.

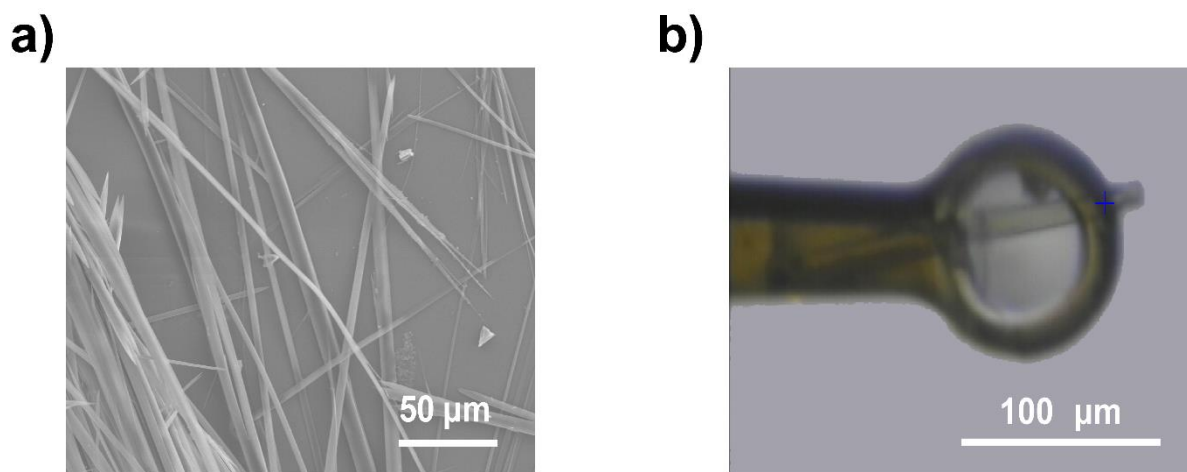

4  
5 **Supplementary Figure 9.** Images of the PNA-quadruplex crystals. **(a)** SEM image. **(b)** View  
6 of the PNA-quadruplex crystal mounted and used for data collection.

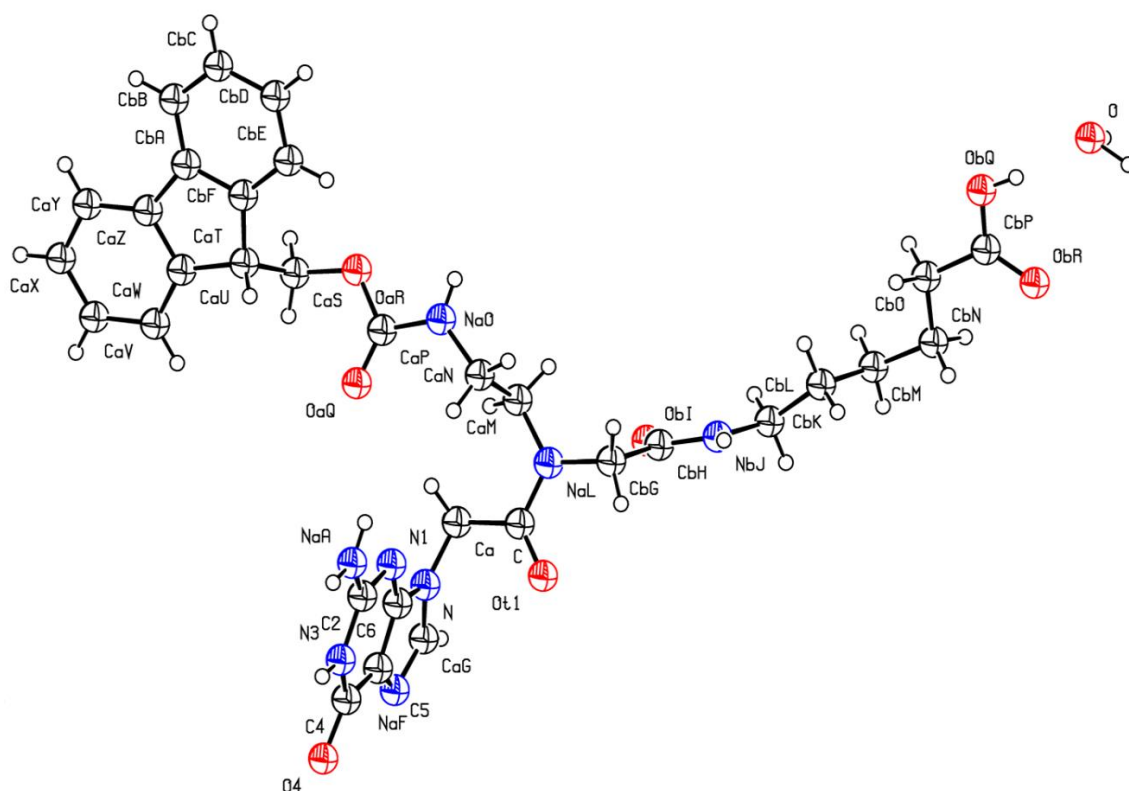

7  
8 **Supplementary Figure 10.** ORTEP diagram of the PNA derivative in 50% probability  
9 ellipsoids, obtained from single crystal X-ray structure.

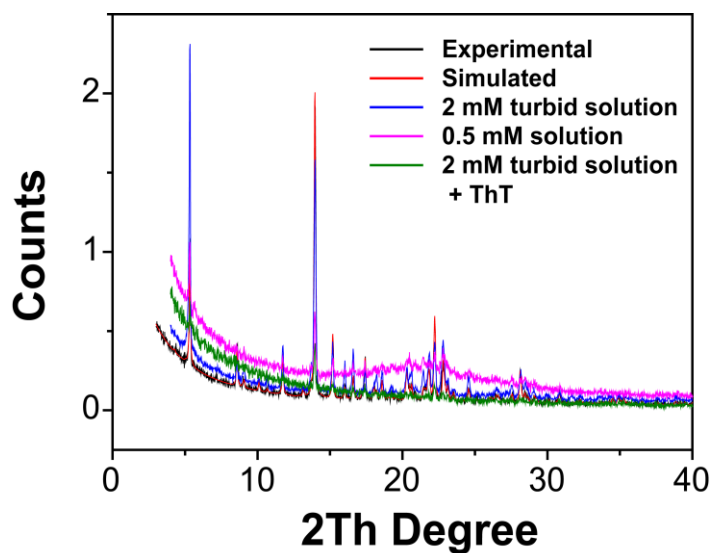

1

2 **Supplementary Figure 11.** Comparison of PXRD profiles of various self-assembled structural  
 3 forms of PNA-quadruplex.

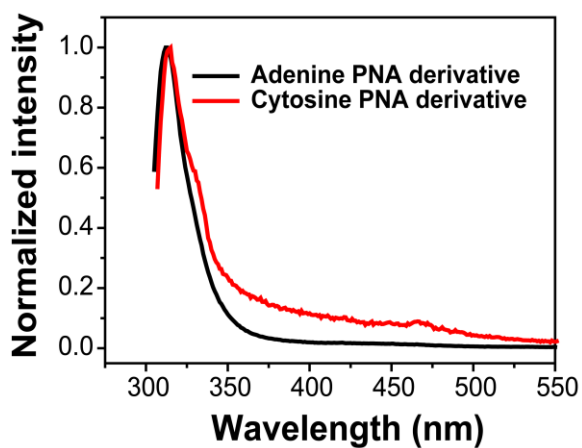

4

5 **Supplementary Figure 12.** Fluorescence emission spectra for adenine and cytosine PNA-  
 6 derivative at 2 mM.

7

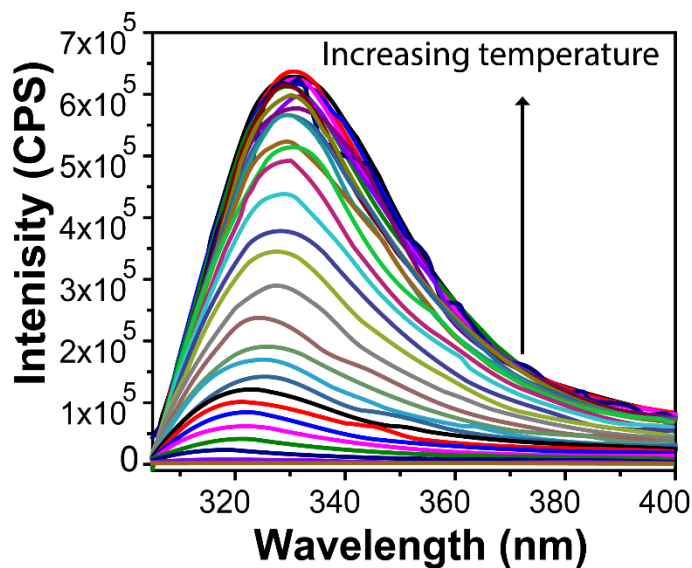

1

2 **Supplementary Figure 13.** Temperature dependence of the fluorescence emission peak at 330  
 3 nm, obtained from the PNA-quadruplex solution upon excitation at  $\lambda_{\text{ex}}=290$  nm.

4

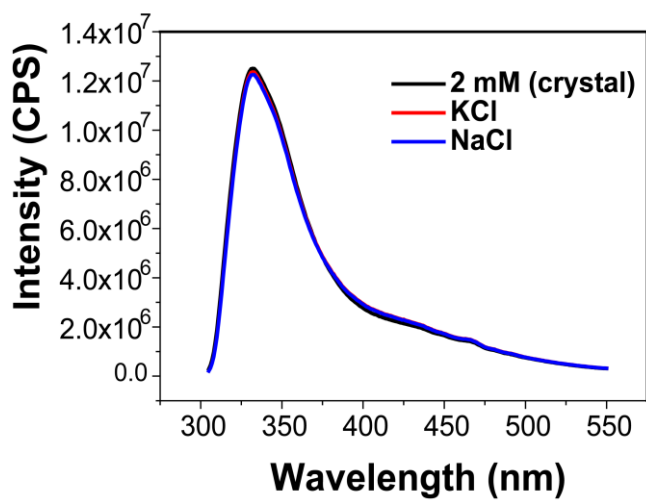

5

6 **Supplementary Figure 14.** Fluorescence emission spectra of PNA-quadruplex in the presence  
 7 of 100 mM Na<sup>+</sup> or K<sup>+</sup> ions.



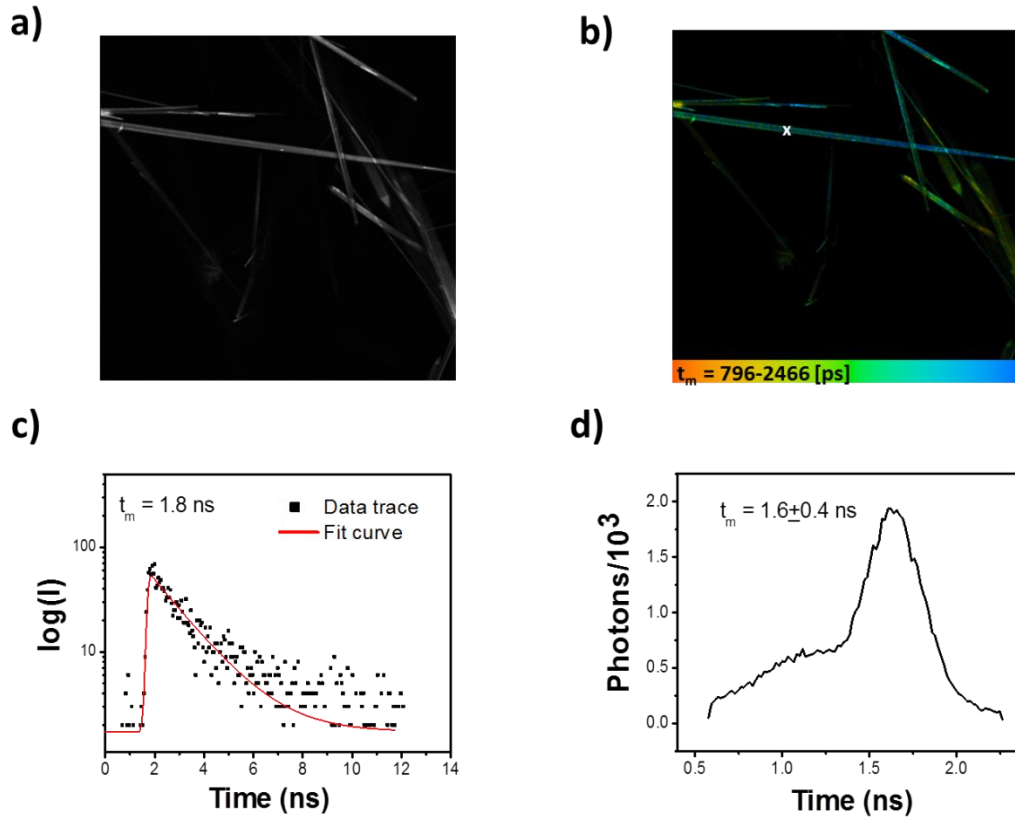

1

2 **Supplementary Figure 15.** FLIM characterization of PNA-quadruplex. (a) Bright field and  
 3 (b) Fluorescence image of the PNA-quadruplex crystals. (c) Representative fluorescent  
 4 emission decay curve at the white point in the FLIM image, showing a lifetime of  $\sim 2.0$  ns. (d)  
 5 Statistical fluorescence lifetime distribution of the crystals.

6

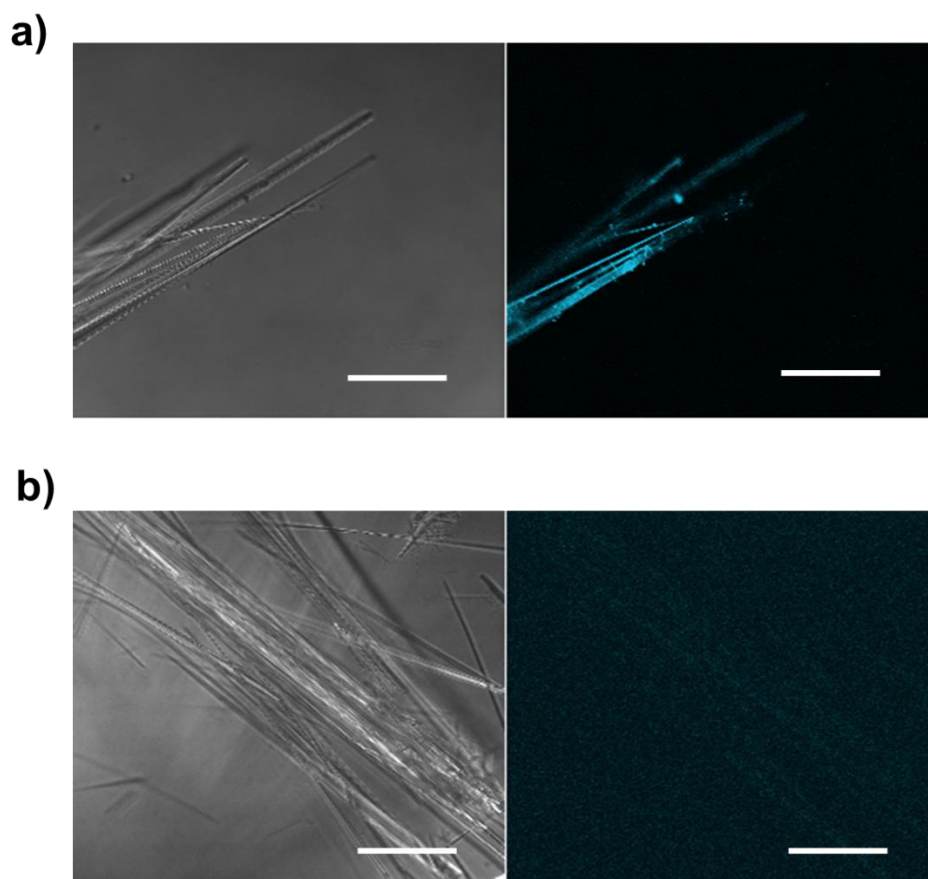

1

2 **Supplementary Figure 16.** Confocal fluorescence microscopy images of the PNA-quadruplex  
 3 (a) with ThT, (b) without ThT. (left panel: bright field; right panel: fluorescent image,  $\lambda_{\text{exc}} =$   
 4 458 nm, scale bar 50  $\mu\text{M}$ ).

5

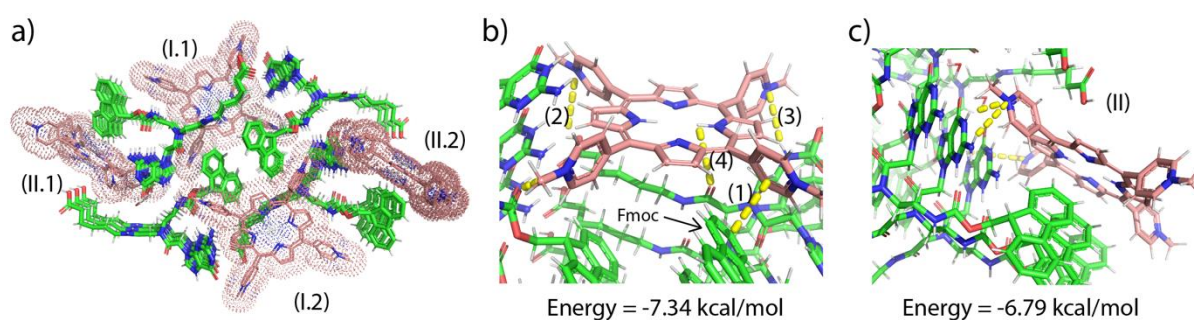

6

7 **Supplementary Figure 17.** Results of molecular docking of TMPyP4 to quadruplex inspired  
 8 PNA-assemblies. (a) Binding sites of the first thirty energy-optimized docking pattern. The  
 9 conformations are clustered into two groups: I.1 and I.2 are equivalent due to the crystal  
 10 symmetry, so are II.1 and II.2. (b-c) Interactions responsible for molecule binding in the first  
 11 (b) and the second (c) conformation clusters.

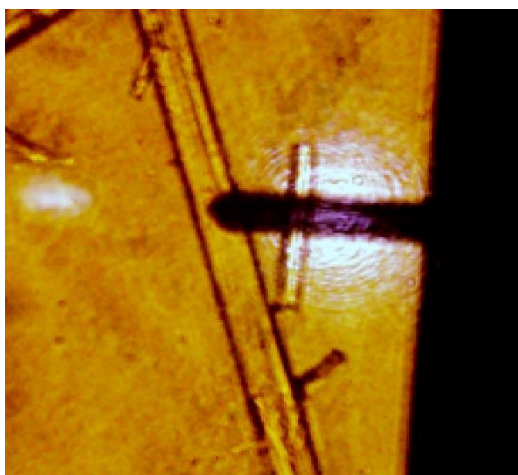

1

2 **Supplementary Figure 18.** Typical IT-AFM image. The crystals were fixed to the surface of  
 3 the quartz substrate and the cantilever was moved to the crystal surface while monitoring under  
 4 an optical microscope.

5 **Supplementary Table 1.** Crystallographic and computed lattice parameters for the PNA-  
 6 quadruplex crystals, in Å. Values in parentheses indicate the relative error in the computed  
 7 lattice parameters, with respect to experiment.

|              | $\vec{a}$    | $\vec{b}$     | $\vec{c}$     |
|--------------|--------------|---------------|---------------|
| Experimental | 4.74         | 32.86         | 20.48         |
| TS-vdW DFT   | 4.66 (-1.7%) | 32.63 (-0.7%) | 20.33 (-0.7%) |

8

9 **Supplementary Details 1. Calculation of elastic constant tensor.** 6 different distortions were  
 10 applied to the unit cell, where, 1-6 are xx, yy, zz, yz, xz, and xy in the Voigt notation. These  
 11 are:

$$\begin{aligned}
 & \begin{pmatrix} 1 + \delta_1 & 0 & 0 \\ 0 & 1 & 0 \\ 0 & 0 & 1 \end{pmatrix}, \quad \begin{pmatrix} 1 & 0 & 0 \\ 0 & 1 + \delta_2 & 0 \\ 0 & 0 & 1 \end{pmatrix}, \quad \begin{pmatrix} 1 & 0 & 0 \\ 0 & 1 & 0 \\ 0 & 0 & 1 + \delta_3 \end{pmatrix}, \quad \begin{pmatrix} 1 & 0 & 0 \\ 0 & 1 & \delta_4 \\ 0 & 0 & 1 \end{pmatrix}, \quad \begin{pmatrix} 1 & 0 & 0 \\ 0 & 1 & 0 \\ \delta_5 & 0 & 1 \end{pmatrix}, \\
 & \begin{pmatrix} 1 & \delta_6 & 0 \\ 0 & 1 & 0 \\ 0 & 0 & 1 \end{pmatrix}
 \end{aligned}$$

13

14 For each distortion, 5 strain ( $\delta$ ) values (0,  $\pm 0.005$ ,  $\pm 0.01$ ) were applied to calculate stress. The  
 15 elastic tensor was obtained from numerical fitting of the obtained stress-strain curves.

16

1 **Supplementary Table 2.** PNA-quadruplex data collection and refinement statistics.

| <b>Data collection</b>                              | <b>PNA-quadruplex</b> |
|-----------------------------------------------------|-----------------------|
| Space group                                         | P2 <sub>1</sub> /c    |
| Cell dimensions                                     |                       |
| <i>a</i> , <i>b</i> , <i>c</i> (Å)                  | 4.74, 32.9, 20.5      |
| <i>α</i> , <i>β</i> , <i>γ</i> (°)                  | 90.0, 91.9, 90.0      |
| Resolution (Å)                                      | 0.80 (0.82-0.80)      |
| <i>R</i> <sub>sym</sub>                             | 0.048 (0.139)         |
| <i>I</i> / <i>σI</i>                                | 17.2 (5.0)            |
| CC <sub>1/2</sub>                                   | 99.9 (98.8)           |
| Completeness (%)                                    | 89.4 (72.9)           |
| Redundancy                                          | 4.6 (3.1)             |
| <b>Refinement</b>                                   |                       |
| Resolution (Å)                                      | 0.80                  |
| No. reflections                                     | 5271                  |
| <i>R</i> <sub>work</sub> / <i>R</i> <sub>free</sub> | 0.080/0.085           |
| No. atoms                                           |                       |
| PNA-2 (including hydrogen)                          | 83                    |
| Water                                               | 1                     |
| B-factors (Å <sup>2</sup> )                         |                       |
| PNA-2                                               | 4.6                   |
| Water                                               | 5.7                   |
| R.m.s deviations                                    |                       |
| Bond lengths (Å)                                    | 0.022                 |
| Bond angles (°)                                     | 2.2                   |

2 \*Highest resolution shell is shown in parenthesis.
